# Supplementary material
Source: Royal Society of Chemistry journal article supplement (doi:10.1039/d6cc03041f)
Supplement: d6cc03041f1.pdf [file d6cc03041f1.pdf]

## Electronic Supplementary Information

### **Sodium-promoted bimetallic $M\text{-CoO}_x$ catalysts ( $M = \text{In, Ga, Mo, Mn, and V}$ ) for the hydrogenation of $\text{CO}_2$ to $\text{C}_{2+}$ hydrocarbons**

Zuozheng Liu,<sup>a</sup> Furan Guo,<sup>b</sup> Miao Li,<sup>b</sup> Shican Jiang,<sup>a</sup> Xianjun Lang,<sup>\*a</sup> Abhishek Dutta Chowdhury,<sup>\*a</sup> and Kang Cheng,<sup>\*b</sup>

<sup>a</sup> *College of Chemistry and Molecular Sciences, Wuhan University, Wuhan 430072, China*

<sup>b</sup> *State Key Laboratory of Physical Chemistry of Solid Surfaces, Innovation Laboratory for Science and Technologies of Energy Material of Fujian Province (IKKEM), College of Chemistry and Chemical Engineering, Xiamen University, Xiamen 361005, China*

## Experimental Details

### Materials and catalyst preparation

Urea ( $\text{CON}_2\text{H}_4$ ) was purchased from Aladdin Scientific Corp. Sodium carbonate ( $\text{Na}_2\text{CO}_3$ ), Gallium nitrate nonahydrate ( $\text{Ga}(\text{NO}_3)_3 \cdot 9\text{H}_2\text{O}$ ), Manganese nitrate ( $\text{Mn}(\text{NO}_3)_2$ , 50 wt% in water), Indium nitrate tetrahydrate ( $\text{In}(\text{NO}_3)_3 \cdot 4\text{H}_2\text{O}$ ) were purchased from Sinopharm Chemical Reagent Co., Ltd. Ammonium molybdate tetrahydrate ( $(\text{NH}_4)_6\text{Mo}_7\text{O}_{24} \cdot 4\text{H}_2\text{O}$ ) were purchased from Shanghai Titan Scientific Co., Ltd. Ammonium vanadate ( $\text{NH}_4\text{VO}_3$ ) were purchased from Xilong Scientific Co., Ltd. Carbon dioxide ( $\text{CO}_2$ :  $\text{H}_2$ :  $\text{Ar}$  = 24:72:4, 99.9%), Nitrogen ( $\text{N}_2$ , 99.9%) and Hydrogen ( $\text{H}_2$ , 99.9%) were purchased from Huian Kote Gas Co., Ltd.

M-CoO<sub>x</sub> (M = In, Ga, Mo, Mn, and V) bimetallic oxide catalysts were prepared via a urea-assisted hydrothermal precipitation method. In a typical synthesis process, 4.4 g of  $\text{Co}(\text{NO}_3)_2 \cdot 6\text{H}_2\text{O}$  and an appropriate amount of the M precursor (the M loading was 1.0 wt% unless otherwise specified) were dissolved in 50 mL of deionized water under magnetic stirring until completely dissolved. Subsequently, 5.4 g of urea (Urea/metal (molar ratio) = 6.0) was added, and the mixture was stirred for another 30 min to form a uniform solution. The resulting solution was transferred into a Teflon-lined stainless-steel autoclave and maintained at 120 °C for 8 h. After cooling to room temperature, the precipitate was centrifuged and washed with deionized water and ethanol until the pH of the supernatant reached neutrality. The obtained solid was dried at 80 °C for 12 h, then calcined in a muffle furnace by heating to 500 °C at a rate of 5 °C·min<sup>-1</sup> and holding for 2 h. After cooling to room temperature, the M-CoO<sub>x</sub> catalysts were obtained. The catalyst is denoted as CoO<sub>x</sub>, referring to the mixed-valence cobalt phase ( $\text{Co}^0$  and  $\text{Co}^{\delta+}$ ) generated after  $\text{H}_2$  reduction and under working conditions, unless otherwise specified.

Na-promoted M-CoO<sub>x</sub> catalysts were further prepared by an impregnation method. Specifically, 200 mg of M-CoO<sub>x</sub> and an appropriate amount of  $\text{Na}_2\text{CO}_3$  (corresponding to a Na loading of 1.0 wt%) were dispersed in a mixed solvent containing 500 μL of deionized water. The resulting suspension was ultrasonicated for 1 h and then aged at room temperature for 2 h. The sample was subsequently dried at 80 °C overnight and calcined at 300 °C for 2 h in a muffle furnace to obtain the Na-M-CoO<sub>x</sub> catalyst.

### Catalytic reaction

The catalytic performance was evaluated in a continuous fixed-bed reactor built by Xiamen HanDe Engineering Co., Ltd. Typically, 0.1 g of catalyst (40–60 meshes) was diluted with 0.5 g of SiC and

mounted inside the reactor. Before the reaction, the catalyst was reduced with a H<sub>2</sub> of 8 mL·min<sup>-1</sup> at 300 °C for 2 h unless otherwise specified and then cooled to room temperature. The reactant gas mixture with an H<sub>2</sub>/CO<sub>2</sub>/Ar (volume ratio of 72/24/4) and a typical WHSV of 6000 mL·g<sub>cat</sub><sup>-1</sup>·h<sup>-1</sup> was introduced into the reactor and pressured to 3 MPa to start the reaction.

The products were analyzed with an online gas chromatograph (Ruimin GC-2060). Ar, CO, CO<sub>2</sub>, and CH<sub>4</sub> were separated by a TDX-01 packed column and analyzed with a TCD detector. Hydrocarbon products were separated by Rt-Q-Bond and KB-PONA capillary columns, then analyzed with an FID detector. All connection lines between the reactor and GC were heated at 220 °C to gasify all the products.

The CO<sub>2</sub> was calculated by the following formula:

$$X_{\text{CO}_2}(\%) = \left( 1 - \frac{(A_{\text{CO}_2}/A_{\text{Ar}})}{(A_{\text{CO}_2}^0/A_{\text{Ar}}^0)} \right) * 100\%$$

$A_{\text{CO}_2}$  and  $A_{\text{Ar}}$  represent the thermal conductivity detector (TCD) peak area of CO<sub>2</sub> and Ar during the reaction.  $A_{\text{CO}_2}^0$  and  $A_{\text{Ar}}^0$  are the TCD peak areas of CO<sub>2</sub> and Ar recorded in a blank measurement.

CO selectivity in CO<sub>2</sub> hydrogenation was calculated separately, according to the following formula:

$$S_{\text{CO}}(\%) = \left( \frac{\text{CO}_{\text{out}}}{\text{CO}_{2\text{in}} - \text{CO}_{2\text{out}}} \right) * 100\%$$

where  $\text{CO}_{2\text{in}}$ ,  $\text{CO}_2/\text{CO}_{\text{out}}$  are CO<sub>2</sub>/CO concentrations in the inlet and outlet gas flow.

The hydrocarbon selectivity in CO<sub>2</sub> hydrogenation was calculated using the formula:

$$S_{\text{C}_x\text{H}_y}(\%) = \left( \frac{x(\text{C}_x\text{H}_y)_{\text{out}}}{\sum_{n=1}^{\infty} n\text{C}_n\text{H}_y} \right) * 100\%$$

In this equation,  $(\text{C}_x\text{H}_y)_{\text{out}}$  corresponds to the individual hydrocarbon product at the outlet.

$$\text{STY}_i(\text{mmol} \cdot \text{g}_{\text{cat}}^{-1} \cdot \text{h}^{-1}) = X_{\text{CO}_2} * F_{\text{CO}_2} * S_i * 60 / (22.4 * M_{\text{cat}} * 10^4)$$

where  $X_{\text{CO}_2}$  denotes the conversion of CO<sub>2</sub>.  $F_{\text{CO}_2}$  denotes the CO<sub>2</sub> gas flow rate, and the unit is mL·min<sup>-1</sup>.  $S_i$  denotes the selectivity of  $i$ ,  $M_{\text{cat}}$  denotes the weight of the catalyst, and the unit is g.

$$\ln \frac{W_n}{n} = n \ln \alpha + \ln \frac{(1-\alpha)^2}{\alpha}$$

$W_n$  is the mass fraction of the component with carbon number  $n$ ;  $\alpha$  is the chain growth factor.

The hydrocarbon selectivity and formation rates are presented on a carbon basis, i.e., the amount of CO<sub>2</sub> converted to a certain hydrocarbon molecule. The carbon balances are better than 95%.

## Catalyst characterization

X-ray powder diffraction (XRD) measurements were conducted on a Rigaku Ultima IV diffractometer. The Cu K $\alpha$  radiation ( $\lambda = 0.15$  nm) generated at 40 kV and 30 mA was used as the X-ray source. High-Resolution Transmission Electron Microscopy (HRTEM) and Energy Dispersive X-ray Spectroscopy Mapping (EDS-Mapping) were carried out on a JEOL JEM-F200 field-emission transmission electron microscope operated at an accelerating voltage of 200 kV and a JEOL JEM-ARM300F2 cold field-emission transmission electron microscope operated at an accelerating voltage of 300 kV. The Scherrer-derived crystallite size and TEM-observed particle size are not directly equivalent, as the latter may be influenced by particle aggregation and sampling statistics. The Scherrer analysis is mainly used here to compare the relative size trends among different samples. Scanning Electron Microscope (SEM) images were obtained from the Hitachi UHR FE-SEM SU8220 instrument. The nitrogen adsorption and desorption isotherms were measured at the Micromeritics ASAP 2020 fully automatic surface area analyzer. Before the experiment, the samples were placed in a vacuum environment and treated for 4 h at 200 °C to eliminate gas impurities completely from the catalyst surface. The total specific surface area was determined after using the BET method, while the external surface area and micropore volume were derived from the t-plot method. The total pore volume was derived from a single-point measurement at  $P/P_0 = 0.99$ . The UV-vis absorption spectra were recorded on a Cary 5000 UV-Vis-NIR spectrophotometer (Agilent Technologies, USA) over the range of 200–800 nm with a scanning rate of 20 nm s<sup>-1</sup>. The actual loading of Na, Co, and V on various catalysts was measured by inductively coupled plasma optical emission spectroscopy (ICP-OES) with a Varian ICP-OES 720.

H<sub>2</sub> temperature-programmed reduction (H<sub>2</sub>-TPR) measurements were performed on a Beijing JWGB Instrument AMI-300. For H<sub>2</sub>-TPR measurements, 50 mg of the sample was pretreated at 300 °C for 1 h under He flow to remove any absorbed ambient gas molecules on the catalyst surface. After cooling to 50 °C, a 10 vol% H<sub>2</sub>/Ar mixture with a rate of 30 mL min<sup>-1</sup> was introduced into the reactor, and the temperature was raised from 50 to 700 °C at a temperature ramp of 10 °C min<sup>-1</sup>. The consumption of H<sub>2</sub> was monitored by a thermal conductivity detector.

Ex situ X-ray photoelectron analysis (XPS) was performed with an Axis Ultra DLD (Kratos Tech.) equipment. The spectra were excited by a monochromatized Al K $\alpha$  source (1486.6 eV) run at 15 kV and 10 mA. For the calibration measurement, the C 1s peak at 284.8 eV was used as a reference standard to

calibrate the binding energy. The used catalysts for characterization were passivated by a gas flow of 1 vol% O<sub>2</sub> in N<sub>2</sub> at room temperature for 30 min before being removed from the reactor. In situ diffuse reflectance infrared Fourier-transform spectroscopy (DRIFTS) was performed on a Bruker Vertex 70v equipped with a mercury cadmium telluride (MCT) detector. For the CO<sub>2</sub>/H<sub>2</sub> co-feed reaction study, the catalysts were first reduced in flowing H<sub>2</sub> at 300 °C for 2 h. followed by purging with Ar at the same temperature for 30 min. After cooling the sample to 250 °C, a background spectrum was collected from 900 to 4000 cm<sup>-1</sup> with 64 scans and a resolution of 4 cm<sup>-1</sup>. Subsequently, a gas mixture of CO<sub>2</sub>/H<sub>2</sub> (24% CO<sub>2</sub>, 72% H<sub>2</sub>, and 4% Ar) was introduced into the reaction cell with a flow rate of 20 mL·min<sup>-1</sup> to 2 MPa. Sample spectra were then acquired under the same scanning parameters as the background, recorded at 1 min intervals until spectral features stabilized.

## Supplementary tables and figures

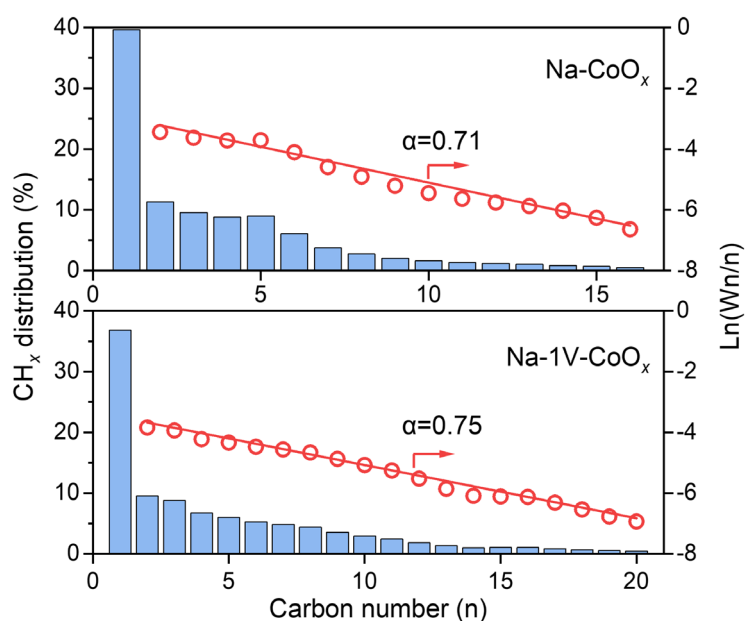

**Fig. S1** The hydrocarbon distribution and ASF plots (C<sub>2</sub>–C<sub>20</sub>) of Na-CoO<sub>x</sub> and Na-1V-CoO<sub>x</sub> in CO<sub>2</sub> hydrogenation. Reaction conditions: 0.1 g, 250 °C, H<sub>2</sub>/CO<sub>2</sub> = 3, 3 MPa, 6000 mL·g<sub>cat.</sub><sup>-1</sup>·h<sup>-1</sup>.

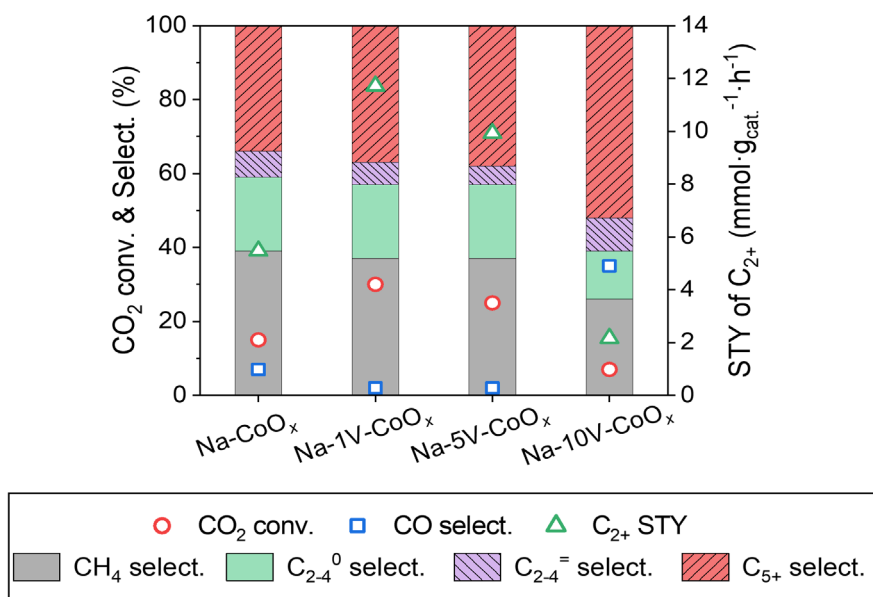

**Fig. S2** Catalytic performance of CO<sub>2</sub> hydrogenation over Na-CoO<sub>x</sub> and Na-yV-CoO<sub>x</sub> catalysts (y = 1.0, 5.0, and 10 wt%). Reaction conditions: 0.1 g, 250 °C, H<sub>2</sub>/CO<sub>2</sub> = 3, 3 MPa, 6000 mL·g<sub>cat.</sub><sup>-1</sup>·h<sup>-1</sup>.

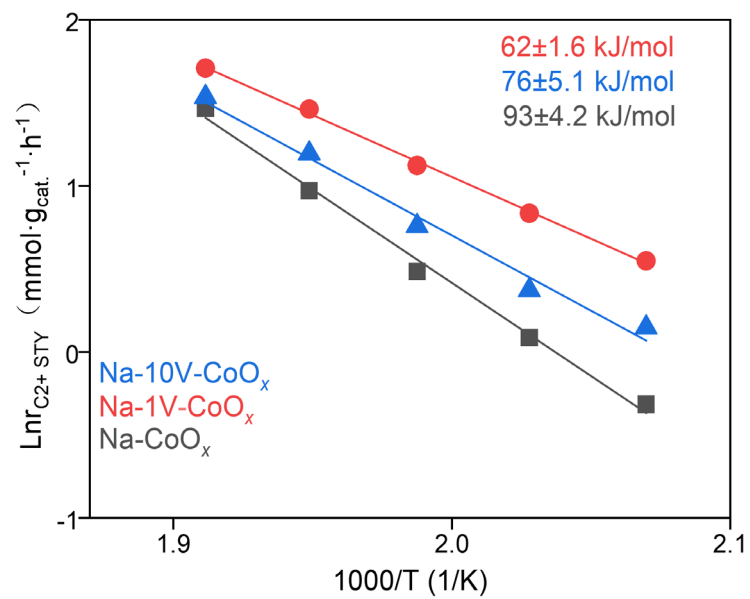

**Fig. S3** Arrhenius plots for CO<sub>2</sub> hydrogenation over Na-CoO<sub>x</sub> and Na-yV-CoO<sub>x</sub> catalysts (y = 1.0 and 10 wt%). Reaction conditions: 0.1 g, 210-250 °C, H<sub>2</sub>/CO<sub>2</sub> = 3, 3 MPa, 9000 mL·g<sub>cat</sub><sup>-1</sup>·h<sup>-1</sup>.

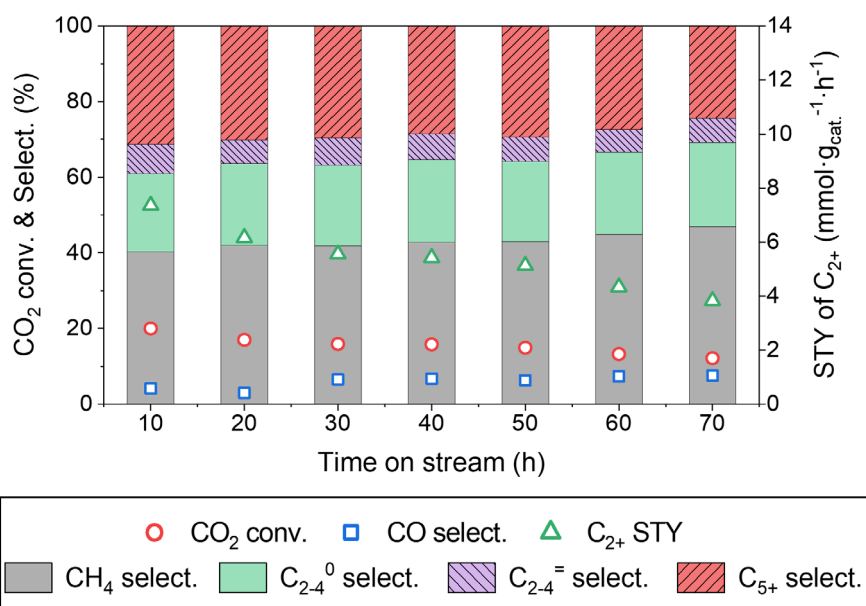

**Fig. S4** Stability of Na-CoO<sub>x</sub> in CO<sub>2</sub> hydrogenation. Reaction conditions: 0.1 g, 250 °C, H<sub>2</sub>/CO<sub>2</sub> = 3, 3 MPa, 6000 mL·g<sub>cat.</sub><sup>-1</sup>·h<sup>-1</sup>.

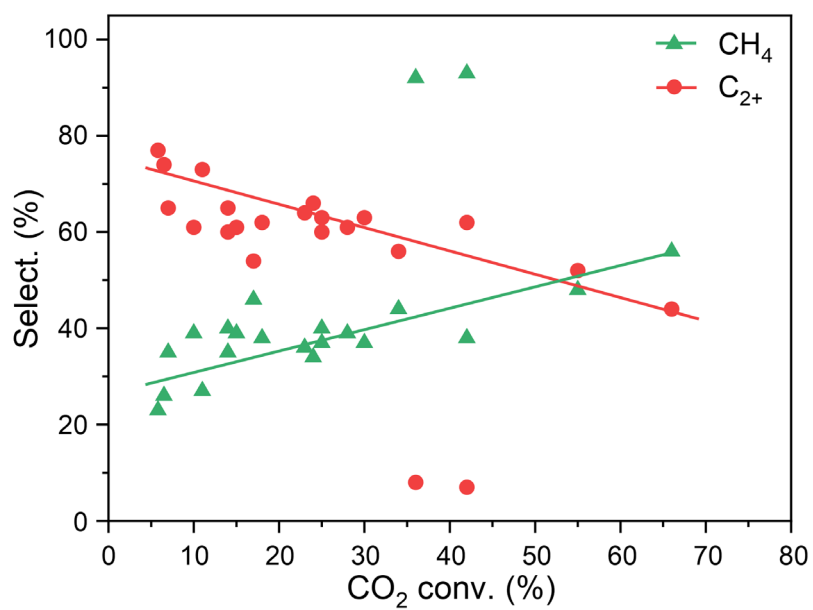

**Fig. S5** CH<sub>4</sub>, and C<sub>2+</sub> selectivities as a function of CO<sub>2</sub> conversion over Co-based catalysts. Detailed reaction conditions and performances are listed in Table S2.

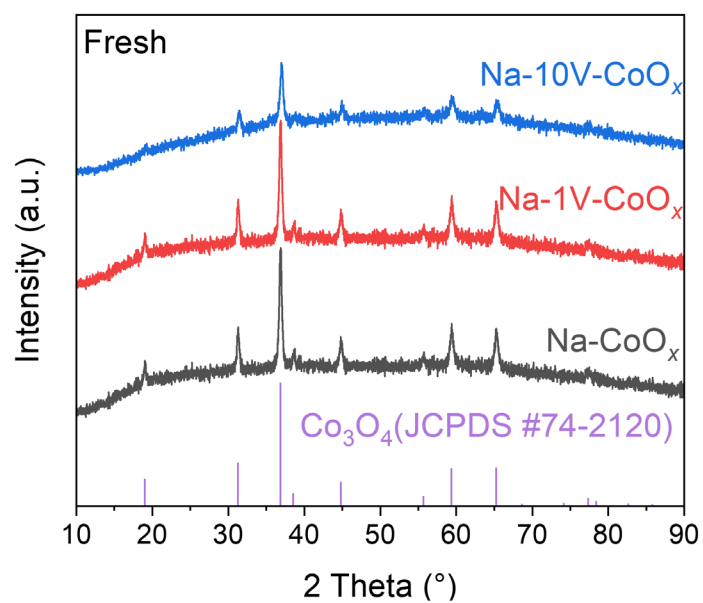

**Fig. S6** XRD patterns of fresh Na-CoO<sub>x</sub> and Na-yV-CoO<sub>x</sub> catalysts (y = 1.0 and 10 wt%).

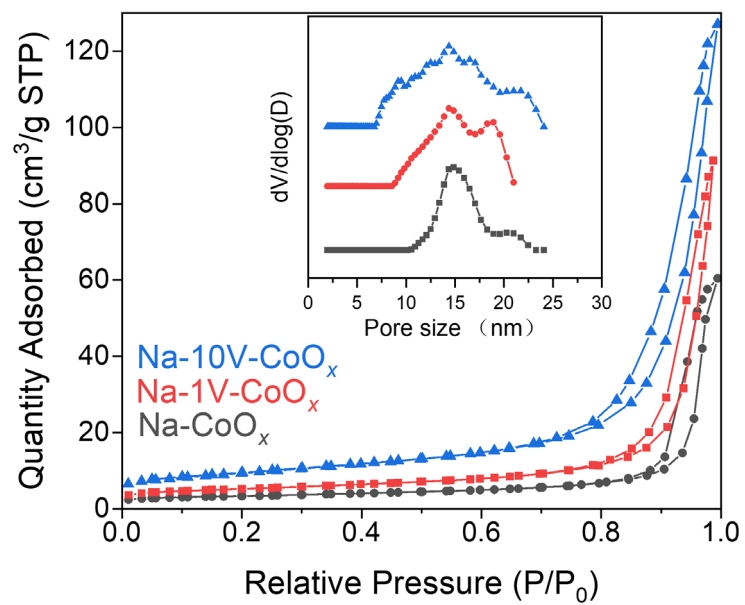

**Fig. S7** Nitrogen adsorption-desorption isotherms of fresh Na-CoO<sub>x</sub> and Na-yV-CoO<sub>x</sub> catalysts (y = 1.0 and 10 wt%).

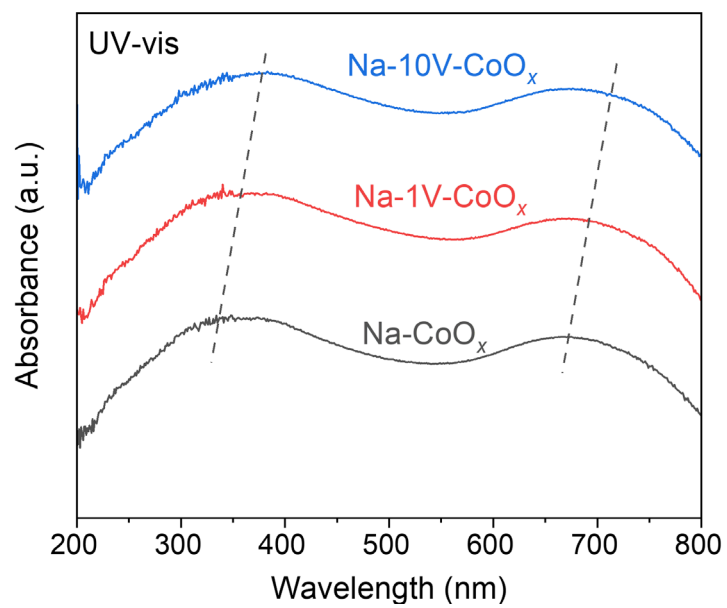

**Fig. S8** Uv-vis profiles of fresh Na-CoO<sub>x</sub> and Na-yV-CoO<sub>x</sub> catalysts (y = 1.0 and 10 wt%).

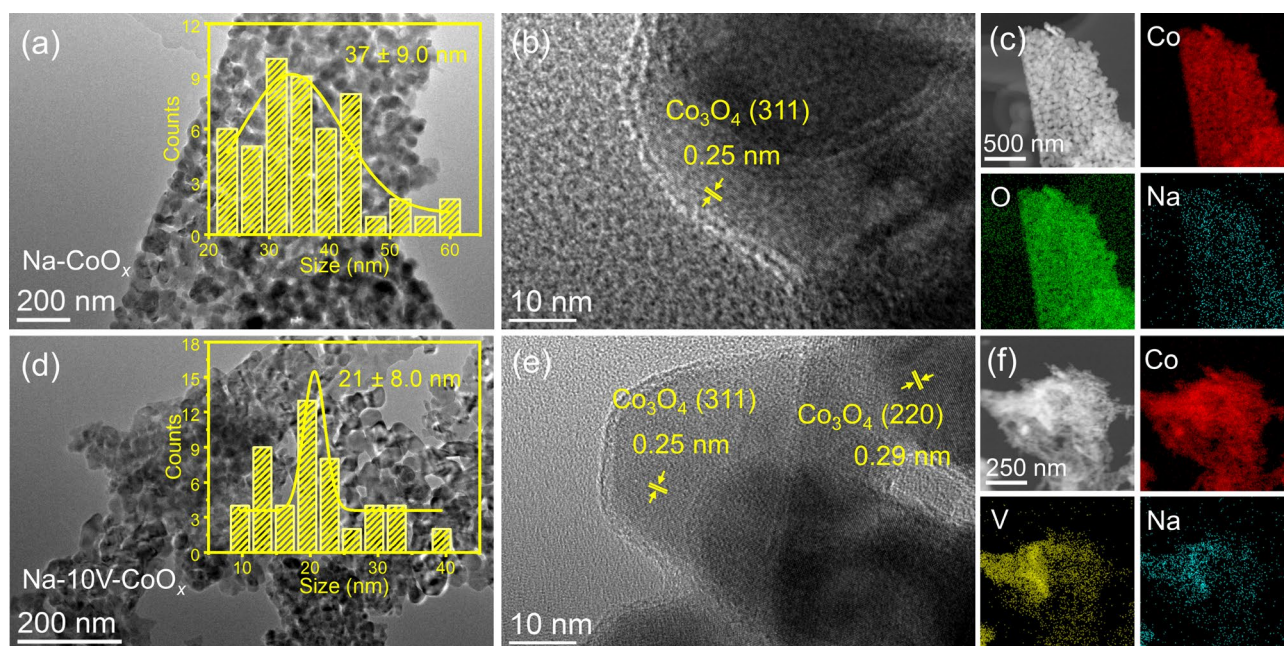

**Fig. S9** HRTEM and STEM-EDS mapping of fresh (a-c) Na-CoO<sub>x</sub> and (d-f) Na-10V-CoO<sub>x</sub> catalysts.

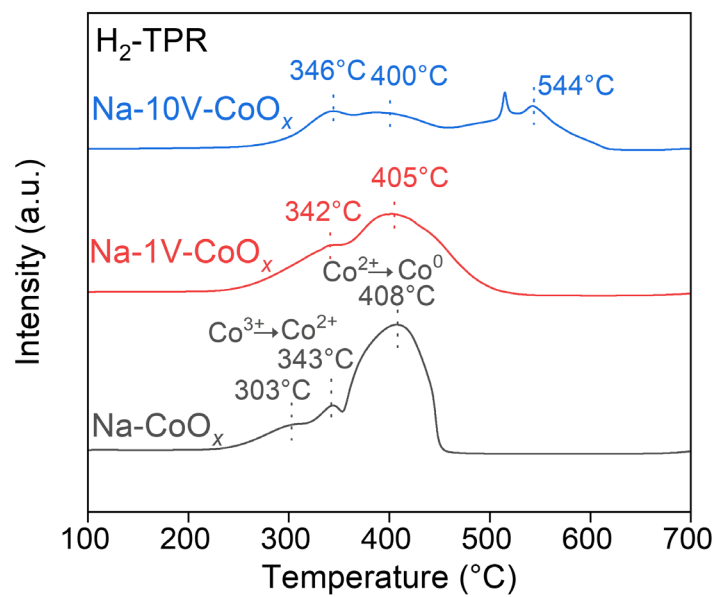

**Fig. S10** (a) H<sub>2</sub>-TPR spectra of fresh Na-CoO<sub>x</sub> and Na-yV-CoO<sub>x</sub> catalysts (y = 1.0 and 10 wt%).

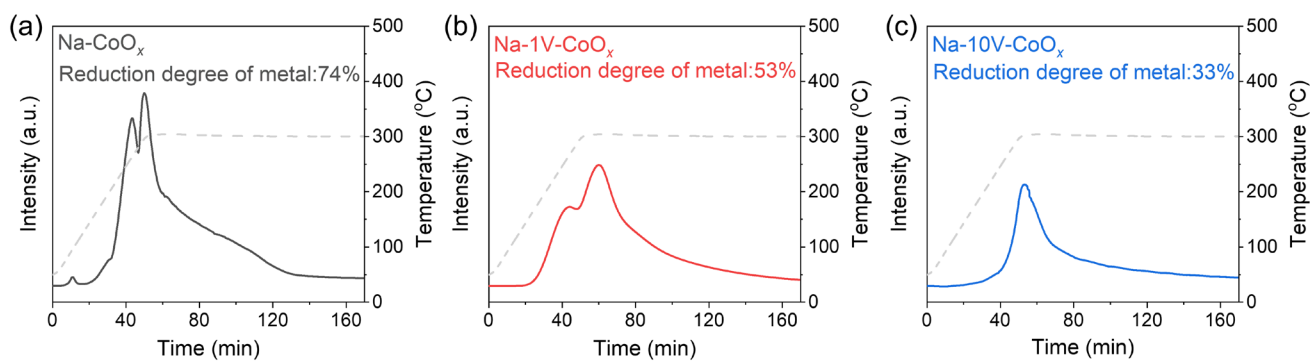

**Figure S11** H<sub>2</sub>-TPR profiles of (a) Na-CoO<sub>x</sub>, (b) Na-1V-CoO<sub>x</sub>, and (c) Na-10V-CoO<sub>x</sub> catalysts. CuO was chosen as the standard sample to calibrate the H<sub>2</sub> consumption, and then the H<sub>2</sub> consumption of the catalyst was compared with it to determine the reduction degree of the metal.

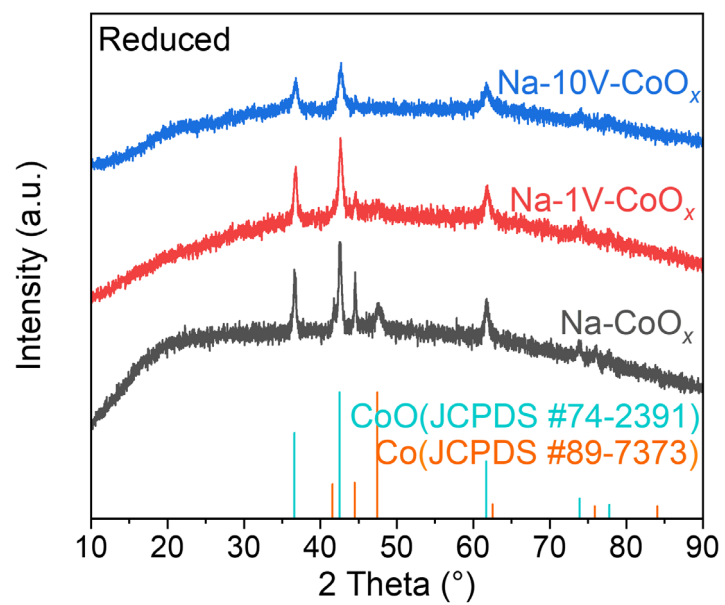

**Fig. S12 (a)** XRD patterns of reduced Na-CoO<sub>x</sub> and Na-yV-CoO<sub>x</sub> catalysts (y = 1.0 and 10 wt%).

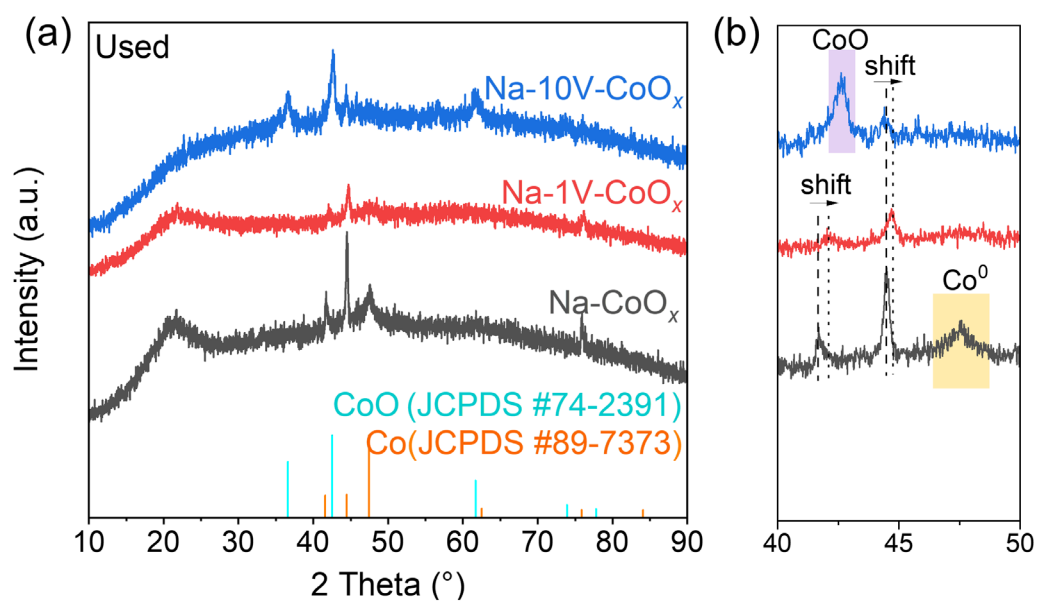

**Fig. S13** (a) XRD patterns of used Na-CoO<sub>x</sub> and Na- $\gamma$ V-CoO<sub>x</sub> catalysts ( $\gamma = 1.0$  and 10 wt%). (b) Magnified XRD patterns in the 2-theta range of 40-50°.

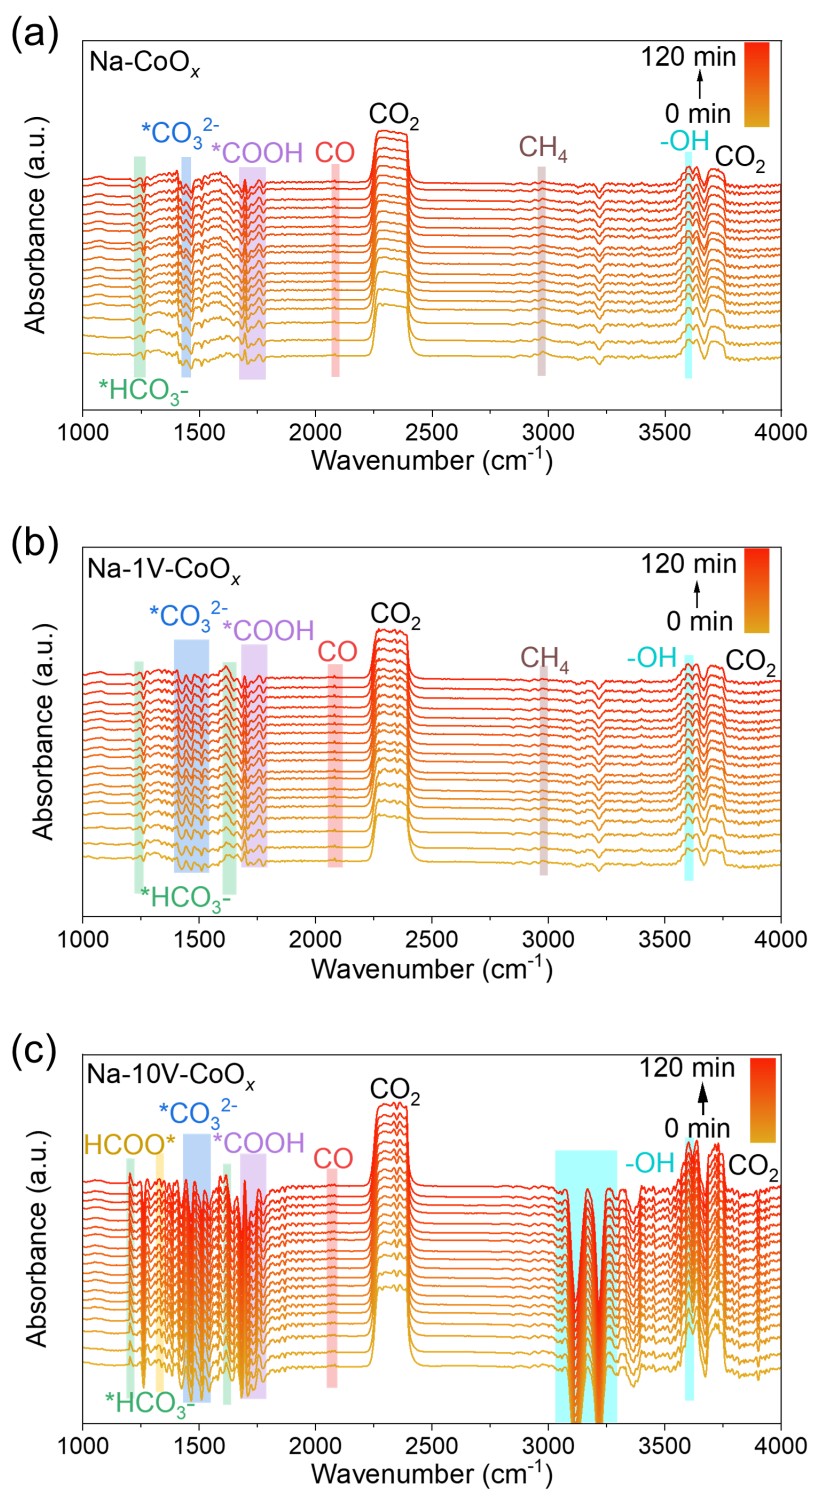

**Fig. S14** *In-situ* DRIFTS during the  $\text{CO}_2$  hydrogenation of (a)  $\text{Na-CoO}_x$ , (b)  $\text{Na-1V-CoO}_x$ , and (c)  $\text{Na-10V-CoO}_x$ .

**Table S1** Statistics of Co and Fe-based catalysts for CO<sub>2</sub> hydrogenation to C<sub>2+</sub> hydrocarbons.

| Catalysts                                          | Reaction condition  |                         |                                                                                        |                                |                | Catalytic performance       |                              |                             |                            |                                                                               |     | Ref. |
|----------------------------------------------------|---------------------|-------------------------|----------------------------------------------------------------------------------------|--------------------------------|----------------|-----------------------------|------------------------------|-----------------------------|----------------------------|-------------------------------------------------------------------------------|-----|------|
|                                                    | Reaction temp. (°C) | Reaction pressure (MPa) | H <sub>2</sub> /CO <sub>2</sub> (mL·g <sub>cat.</sub> <sup>-1</sup> ·h <sup>-1</sup> ) | WHSV CO <sub>2</sub> conv. (%) | CO select. (%) | CH <sub>4</sub> select. (%) | C <sub>2-4</sub> select. (%) | C <sub>5+</sub> select. (%) | C <sub>2+H</sub> yield (%) | C <sub>2+H</sub> STY (mmol·g <sub>cat.</sub> <sup>-1</sup> ·h <sup>-1</sup> ) |     |      |
| Na-CoCu/TiO <sub>2</sub>                           | 250                 | 5                       | 3                                                                                      | 3,000                          | 18             | 30                          | 19                           | 22                          | 29                         | 9.2                                                                           | 3.1 | 1    |
| Na-CoZrO <sub>x</sub> -8                           | 270                 | 4                       | 3                                                                                      | 4,000                          | 70             | 0.1                         | 43                           | 19                          | 39                         | 40                                                                            | 17  | 2    |
| K-CoCuO <sub>x</sub>                               | 300                 | 3                       | 3                                                                                      | 6,000                          | 34             | 10                          | 25                           | 44                          | 21                         | 22                                                                            | 14  | 3    |
| Na-CoMn                                            | 270                 | 4                       | 3                                                                                      | 4,000                          | 64             | 0                           | 45                           | 22                          | 33                         | 35                                                                            | 14  | 4    |
| Na <sub>0.02</sub> Fe <sub>1</sub> Co <sub>1</sub> | 320                 | 3                       | 3                                                                                      | 4800                           | 56             | 4.0                         | 26                           | 44                          | 26                         | 39                                                                            | 20  | 5    |
| Na-CoMn-TiO <sub>2</sub>                           | 270                 | 4                       | 3                                                                                      | 4,000                          | 42             | 0                           | 42                           | 23                          | 35                         | 24                                                                            | 10  | 6    |
| Co-TiO <sub>2</sub>                                | 220                 | 2                       | 2                                                                                      | 1620                           | 16             | 25                          | 56                           | 20                          | 24                         | 5.3                                                                           | 0.9 | 7    |
| 65Co-30Cu-5La                                      | 200                 | 1                       | 3                                                                                      | 2000                           | 35             | 0                           | 65                           | 15                          | 20                         | 12                                                                            | 2.6 | 8    |
| Na-Co-SiO <sub>2</sub>                             | 300                 | 1                       | 3                                                                                      | 18000                          | 10             | 65                          | 15                           | C <sub>2+=20</sub>          |                            | 2.0                                                                           | 3.8 | 9    |

|                          |     |     |   |        |     |     |     |                       |                       |    |    |           |
|--------------------------|-----|-----|---|--------|-----|-----|-----|-----------------------|-----------------------|----|----|-----------|
| Co/MnO <sub>x</sub>      | 400 | 0.1 | 4 | 60000  | 12  | 93  | 7.0 | \                     | \                     | \  | \  | 10        |
| Co-Cu/CeZrO <sub>x</sub> | 400 | 0.1 | 4 | 36000  | 45  | 100 | \   | \                     | \                     | \  | \  | 11        |
| Co                       | 400 | 0.1 | 3 | 240000 | 40  | 100 | \   | \                     | \                     | \  | \  | 12        |
| Co/SiO <sub>2</sub>      | 230 | 2.5 | 3 | 30000  | 5.1 | 55  | 35  | CH <sub>3</sub> OH=10 |                       |    | 13 |           |
| CoO                      | 300 | 0.1 | 3 | \      | 13  | 77  | 23  | \                     | \                     | \  | \  | 14        |
| Na-Co/SiO <sub>2</sub>   | 250 | 5   | 3 | 6000   | 22  | 26  | 38  | 10                    | CH <sub>3</sub> OH=26 |    | \  | 15        |
| Co/MnO@PGC               | 200 | 3   | 3 | 15000  | 46  | 1.0 | 99  | \                     | \                     | \  | \  | 16        |
| Na-FeZn                  | 340 | 2.5 | 3 | 15000  | 38  | 15  | 13  | 47                    | 40                    | 33 | 18 | 17        |
| FeCoK@C                  | 320 | 3   | 3 | 18000  | 52  | 4.6 | 24  | 46                    | 30                    | 40 | 24 | 18        |
| FeCo@ZrO <sub>2</sub>    | 340 | 3   | 3 | 5000   | 45  | 18  | 20  | 63                    | 17                    | 36 | 19 | 19        |
| Na-1V-CoO <sub>x</sub>   | 250 | 3   | 3 | 6000   | 30  | 1.8 | 37  | 25                    | 37                    | 19 | 12 | This work |

**Table S2.** Detailed catalyst information, reaction conditions, and catalytic performance of all Co-based catalysts tested in this study.

| Catalyst                | Reaction conditions             |        |         |                                                                | CO <sub>2</sub><br>conv.<br>(%) | CO select.<br>(%) | CH <sub>4</sub><br>select. (%) | C <sub>2-4</sub> <sup>0</sup><br>select. (%) | C <sub>2-4</sub> <sup>=</sup><br>select. (%) | C <sub>5+</sub><br>select. (%) | O/P | C <sub>2+</sub> STY<br>(mmol·g <sub>cat.</sub> <sup>-1</sup> ·h <sup>-1</sup> ) |
|-------------------------|---------------------------------|--------|---------|----------------------------------------------------------------|---------------------------------|-------------------|--------------------------------|----------------------------------------------|----------------------------------------------|--------------------------------|-----|---------------------------------------------------------------------------------|
|                         | H <sub>2</sub> /CO <sub>2</sub> | T (°C) | P (MPa) | WHSV<br>(mL·g <sub>cat.</sub> <sup>-1</sup> ·h <sup>-1</sup> ) |                                 |                   |                                |                                              |                                              |                                |     |                                                                                 |
| CoO <sub>x</sub>        | 3                               | 250    | 3       | 6000                                                           | 42                              | 0.4               | 93                             | 7.0                                          | 0                                            | 0                              | 0   | 2.8                                                                             |
| 1V-CoO <sub>x</sub>     | 3                               | 250    | 3       | 6000                                                           | 36                              | 0.6               | 92                             | 8.0                                          | 0                                            | 0                              | 0   | 1.8                                                                             |
| Na-CoO <sub>x</sub>     | 3                               | 250    | 3       | 6000                                                           | 15                              | 6.5               | 39                             | 20                                           | 7                                            | 34                             | 0.4 | 5.5                                                                             |
| Na-1In-CoO <sub>x</sub> | 3                               | 250    | 3       | 6000                                                           | 17                              | 3.4               | 46                             | 24                                           | 2                                            | 28                             | 0.1 | 5.7                                                                             |
| Na-1Ga-CoO <sub>x</sub> | 3                               | 250    | 3       | 6000                                                           | 18                              | 5.1               | 38                             | 14                                           | 8                                            | 40                             | 0.6 | 6.8                                                                             |
| Na-1Mo-CoO <sub>x</sub> | 3                               | 250    | 3       | 6000                                                           | 24                              | 11                | 34                             | 17                                           | 12                                           | 37                             | 0.7 | 9.1                                                                             |
| Na-1Mn-CoO <sub>x</sub> | 3                               | 250    | 3       | 6000                                                           | 28                              | 2.2               | 39                             | 17                                           | 8                                            | 36                             | 0.5 | 11                                                                              |
| Na-1V-CoO <sub>x</sub>  | 3                               | 250    | 3       | 6000                                                           | 30                              | 1.8               | 37                             | 20                                           | 6                                            | 37                             | 0.3 | 12                                                                              |
| Na-5V-CoO <sub>x</sub>  | 3                               | 250    | 3       | 6000                                                           | 25                              | 2.3               | 37                             | 20                                           | 5                                            | 38                             | 0.3 | 10                                                                              |
| Na-10V-CoO <sub>x</sub> | 3                               | 250    | 3       | 6000                                                           | 6.5                             | 35                | 26                             | 13                                           | 9                                            | 52                             | 0.7 | 2.2                                                                             |
| Na-1V-CoO <sub>x</sub>  | 3                               | 210    | 3       | 6000                                                           | 5.8                             | 7.9               | 23                             | 20                                           | 7                                            | 50                             | 0.4 | 2.7                                                                             |

|                                              |   |     |   |       |     |     |    |    |    |    |     |     |
|----------------------------------------------|---|-----|---|-------|-----|-----|----|----|----|----|-----|-----|
| Na-1V-CoO <sub>x</sub>                       | 3 | 230 | 3 | 6000  | 11  | 7.5 | 27 | 18 | 11 | 44 | 0.6 | 4.8 |
| Na-1V-CoO <sub>x</sub>                       | 3 | 270 | 3 | 6000  | 55  | 0.7 | 48 | 20 | 2  | 30 | 0.1 | 18  |
| Na-1V-CoO <sub>x</sub>                       | 3 | 290 | 3 | 6000  | 66  | 0.5 | 56 | 18 | 2  | 24 | 0.1 | 19  |
| Na-1V-CoO <sub>x</sub>                       | 3 | 250 | 1 | 6000  | 14  | 11  | 35 | 17 | 10 | 38 | 0.6 | 5.2 |
| Na-1V-CoO <sub>x</sub>                       | 3 | 250 | 2 | 6000  | 23  | 3.3 | 36 | 19 | 9  | 36 | 0.5 | 9.2 |
| Na-1V-CoO <sub>x</sub>                       | 3 | 250 | 4 | 6000  | 34  | 1.1 | 44 | 24 | 4  | 28 | 0.2 | 12  |
| Na-1V-CoO <sub>x</sub>                       | 3 | 250 | 3 | 3000  | 42  | 0   | 38 | 10 | 6  | 46 | 0.6 | 17  |
| Na-1V-CoO <sub>x</sub>                       | 3 | 250 | 3 | 9000  | 14  | 4.6 | 40 | 20 | 6  | 35 | 0.3 | 5.2 |
| Na-1V-CoO <sub>x</sub>                       | 3 | 250 | 3 | 12000 | 10  | 6.2 | 39 | 23 | 6  | 32 | 0.3 | 3.7 |
| Na-1V-CoO <sub>x</sub> -reduced<br>at 250 °C | 3 | 250 | 3 | 6000  | 7.0 | 80  | 35 | 13 | 12 | 40 | 0.9 | 0.6 |
| Na-1V-CoO <sub>x</sub> -reduced<br>at 350 °C | 3 | 250 | 3 | 6000  | 25  | 2.6 | 40 | 23 | 5  | 32 | 0.2 | 9.4 |

---

**Table S3** Textural properties of Na-CoO<sub>x</sub> and Na-yV-CoO<sub>x</sub> catalysts (y = 1.0 and 10 wt%).

| Catalysts                      | Co loading (wt %) <sup>a</sup> | Na loading (wt %) <sup>a</sup> | V loading (wt %) <sup>a</sup> | Surface Area (m <sup>2</sup> /g) <sup>b</sup> | Pore Volume (cm <sup>3</sup> /g) <sup>c</sup> | Pore Size (nm) <sup>c</sup> | Particle Size (nm) <sup>e</sup> | Particle Size (nm) <sup>f</sup> | Phase content <sup>f</sup>     | Degree of reduction <sup>g</sup> |
|--------------------------------|--------------------------------|--------------------------------|-------------------------------|-----------------------------------------------|-----------------------------------------------|-----------------------------|---------------------------------|---------------------------------|--------------------------------|----------------------------------|
| Na-CoO <sub>x</sub> -fresh     | 73                             | 0.9                            | 0                             | 11                                            | 0.1                                           | 29                          | 37                              | 55                              | Co <sub>3</sub> O <sub>4</sub> | 74%                              |
| Na-1V-CoO <sub>x</sub> -fresh  | 71                             | 0.9                            | 0.9                           | 18                                            | 0.1                                           | 27                          | 25                              | 35                              | Co <sub>3</sub> O <sub>4</sub> | 53%                              |
| Na-10V-CoO <sub>x</sub> -fresh | 62                             | 0.9                            | 9.5                           | 32                                            | 0.2                                           | 22                          | 21                              | 30                              | Co <sub>3</sub> O <sub>4</sub> | 33%                              |
| Na-CoO <sub>x</sub> -used      | \                              | \                              | \                             | \                                             | \                                             | \                           | 65                              | 68                              | Co <sup>0</sup>                | \                                |
| Na-1V-CoO <sub>x</sub> -used   | \                              | \                              | \                             | \                                             | \                                             | \                           | 44                              | 46                              | Co <sup>0</sup>                | \                                |
| Na-10V-CoO <sub>x</sub> -used  | \                              | \                              | \                             | \                                             | \                                             | \                           | 30                              | 37                              | CoO and Co <sup>0</sup>        | \                                |

<sup>a</sup> Determined by inductively coupled plasma (ICP) analysis.

<sup>b</sup> Surface area was calculated by using the BET method.

<sup>c</sup> Pore volume and pore size were evaluated by the BJH method.

<sup>e</sup> Determined by TEM analysis.

<sup>f</sup> Determined by XRD analysis.

<sup>g</sup> Determined by H<sub>2</sub>-TPR analysis.

**Table S4** Curve fitting analysis results of XPS for used  $\text{CoO}_x$ ,  $1\text{V-CoO}_x$ ,  $\text{Na-CoO}_x$ , and  $\text{Na-yV-CoO}_x$  catalysts ( $y = 1.0$  and  $10$  wt%).

| Catalysts                               | Component               | spectral shape                          | FWHM          | Position (eV) |        |
|-----------------------------------------|-------------------------|-----------------------------------------|---------------|---------------|--------|
| $\text{CoO}_x$ -used                    | Co $2p_{3/2}$           | $\text{Co}^0$                           | LG (95)       | 0.9           | 778.1  |
|                                         |                         | $\text{Co}^{\delta+}$                   | LG (0)        | 2.3           | 779.8  |
|                                         |                         | $\text{Co}^{2+}(\text{Co}_3\text{O}_4)$ | LG (86)       | 2.5           | 781.0  |
|                                         | O 1s                    | M-O                                     | LG (53)       | 1.3           | 529.6  |
|                                         |                         | C-O                                     | LG (0)        | 1.6           | 531.3  |
|                                         |                         | C=O                                     | LG (34)       | 2.5           | 532.4  |
|                                         |                         | C-C                                     | LG (55)       | 1.2           | 284.8  |
|                                         | C 1s                    | C-O-C                                   | LG (59)       | 2.5           | 286.6  |
|                                         |                         | O-C=O                                   | LG (0)        | 1.5           | 289.2  |
|                                         | $\text{Na-CoO}_x$ -used | Co $2p_{3/2}$                           | $\text{Co}^0$ | LG (87)       | 1.0    |
| $\text{Co}^{\delta+}$                   |                         |                                         | LG (0)        | 3.1           | 779.9  |
| $\text{Co}^{2+}(\text{Co}_3\text{O}_4)$ |                         |                                         | LG (0)        | 3.2           | 781.8  |
| M-O                                     |                         |                                         | LG (52)       | 1.2           | 529.6  |
| O 1s                                    |                         | C-O                                     | LG (0)        | 1.5           | 531.4  |
|                                         |                         | C=O                                     | LG (48)       | 1.9           | 531.9  |
|                                         |                         | C-C                                     | LG (55)       | 1.2           | 284.8  |
| C 1s                                    |                         | C-O-C                                   | \             | \             | \      |
|                                         |                         | O-C=O                                   | \             | \             | \      |
| Na 1s                                   |                         | $\text{Na}^+$                           | LG (39)       | 1.7           | 1071.5 |
| $1\text{V-CoO}_x$ -used                 | Co $2p_{3/2}$           | $\text{Co}^0$                           | LG (95)       | 1.4           | 778.5  |
|                                         |                         | $\text{Co}^{\delta+}$                   | LG (0)        | 2.0           | 780.1  |
|                                         |                         | $\text{Co}^{2+}(\text{Co}_3\text{O}_4)$ | LG (0)        | 2.4           | 781.9  |
|                                         | O 1s                    | M-O                                     | LG (37)       | 1.4           | 530.3  |
|                                         |                         | C-O                                     | LG (0)        | 1.5           | 531.6  |
|                                         |                         | C=O                                     | LG (71)       | 2.0           | 532.3  |
|                                         |                         | C-C                                     | LG (35)       | 1.1           | 284.8  |
|                                         | C 1s                    | C-O-C                                   | LG (73)       | 2.0           | 285.7  |
|                                         |                         | O-C=O                                   | LG (29)       | 2.2           | 289.4  |

|                                   |                      |                                                    |         |     |        |
|-----------------------------------|----------------------|----------------------------------------------------|---------|-----|--------|
|                                   |                      | V <sup>3+</sup>                                    | LG (93) | 1.9 | 514.7  |
|                                   | V 2p <sub>3/2</sub>  | V <sup>4+</sup>                                    | LG (0)  | 1.9 | 516.2  |
|                                   |                      | V <sup>5+</sup>                                    | LG (43) | 1.9 | 517.4  |
|                                   |                      | Co <sup>0</sup>                                    | LG (0)  | 1.3 | 777.7  |
|                                   | Co 2p <sub>3/2</sub> | Co <sup>δ+</sup>                                   | LG (0)  | 2.6 | 779.7  |
|                                   |                      | Co <sup>2+</sup> (Co <sub>3</sub> O <sub>4</sub> ) | LG (0)  | 3.5 | 781.2  |
|                                   |                      | M-O                                                | LG (0)  | 1.9 | 529.5  |
|                                   | O 1s                 | C-O                                                | LG (51) | 1.5 | 531.4  |
|                                   |                      | C=O                                                | LG (0)  | 3.5 | 534.8  |
|                                   |                      | C-C                                                | LG (69) | 1.1 | 284.8  |
| Na-1V-CoO <sub>x</sub> -<br>used  | C 1s                 | C-O-C                                              | \       | \   | \      |
|                                   |                      | O-C=O                                              | \       | \   | \      |
|                                   | Na 1s                | Na <sup>+</sup>                                    | LG (57) | 1.6 | 1071.2 |
|                                   |                      | V <sup>3+</sup>                                    | LG (85) | 1.5 | 514.7  |
|                                   | V 2p <sub>3/2</sub>  | V <sup>4+</sup>                                    | LG (18) | 2.8 | 516.1  |
|                                   |                      | V <sup>5+</sup>                                    | LG (0)  | 1.8 | 516.8  |
|                                   |                      | Co <sup>0</sup>                                    | LG (96) | 2.6 | 777.9  |
|                                   | Co 2p <sub>3/2</sub> | Co <sup>δ+</sup>                                   | LG (0)  | 2.9 | 778.0  |
|                                   |                      | Co <sup>2+</sup> (Co <sub>3</sub> O <sub>4</sub> ) | LG (0)  | 3.5 | 781.5  |
|                                   |                      | M-O                                                | LG (46) | 1.3 | 529.7  |
|                                   | O 1s                 | C-O                                                | LG (43) | 1.8 | 531.4  |
|                                   |                      | C=O                                                | \       | \   | \      |
|                                   |                      | M-C                                                | LG (98) | 0.8 | 283.1  |
| Na-10V-CoO <sub>x</sub> -<br>used | C 1s                 | C-C                                                | LG (27) | 1.3 | 284.8  |
|                                   |                      | C-O-C                                              | LG (0)  | 1.4 | 286.2  |
|                                   |                      | O-C=O                                              | LG (0)  | 2.1 | 288.7  |
|                                   | Na 1s                | Na <sup>+</sup>                                    | LG (37) | 1.6 | 1071.4 |
|                                   |                      | V <sup>3+</sup>                                    | LG (85) | 1.8 | 514.3  |
|                                   | V 2p <sub>3/2</sub>  | V <sup>4+</sup>                                    | LG (0)  | 2.3 | 516.1  |
|                                   |                      | V <sup>5+</sup>                                    | LG (0)  | 2.0 | 517.6  |

**Table S5.** Product formation rates and surface  $\text{Co}^0/\text{Co}^{\delta+}$  ratios over a series of Co-based catalysts

| Catalysts              | $\text{Co}^0/\text{Co}^{\delta+}$ | $\text{C}_{2+\text{H}} \text{STY}$<br>( $\text{mmol} \cdot \text{g}_{\text{cat.}}^{-1} \cdot \text{h}^{-1}$ ) |
|------------------------|-----------------------------------|---------------------------------------------------------------------------------------------------------------|
| $\text{CoO}_x$         | 0.56                              | 2.8                                                                                                           |
| 1V- $\text{CoO}_x$     | 0.53                              | 1.8                                                                                                           |
| Na- $\text{CoO}_x$     | 0.47                              | 5.5                                                                                                           |
| Na-1V- $\text{CoO}_x$  | 0.42                              | 12                                                                                                            |
| Na-10V- $\text{CoO}_x$ | 0.37                              | 2.2                                                                                                           |

## References

- 1 Z. Shi, H. Yang, P. Gao, X. Chen, H. Liu, L. Zhong, H. Wang, W. Wei and Y. Sun, *Chin. J. Catal.*, 2018, **39**, 1294-1302.
- 2 S. S. Bibi, H. Jo, J. R. Sugiarto, S. Ahmed, M. Irshad, W. Yoon and J. Kim, *J. Energy Chem.*, 2025, **108**, 769-784.
- 3 M. Wang, S. Guo, S. Yan, Z. Wang, G. Zhang, H. Gao, M. Zhang, K. Bian, J. Liu, X. Nie, J. Zeng, C. Song and X. Guo, *J. Am. Chem. Soc.*, 2025, **147**, 42051-42060.
- 4 H. Jo, M. K. Khan, M. Irshad, M. W. Arshad, S. K. Kim and J. Kim, *Appl. Catal. B: Environ.*, 2022, **305**, 121041.
- 5 T. Li, H. Zhao, L. Guo, G. Liu, J. Wu, T. Xing, T. Li, Q. Liu, J. Sui, Y. Han, J. Liang, Y. He and N. Tsubaki, *ACS Catal.*, 2025, **15**, 1112-1122.
- 6 H. Jo, H.-J. Chun, J. R. Sugiarto, M. K. Khan, M. Irshad, W. Yoon, S. K. Kim and J. Kim, *Appl. Catal. B: Environ.*, 2024, **359**, 124457.
- 7 C. Scarfiello, K. Soulantica, S. Cayez, A. Durupt, G. Viau, N. Le Breton, A. K. Boudalis, F. Meunier, G. Clet, M. Barreau, D. Salusso, S. Zafeiratos, D. P. Minh and P. Serp, *J. Catal.*, 2023, **428**, 115202.
- 8 V. N. Borshch, S. Ya. Zhuk, E. V. Pugacheva, T. Duncan Dipheko, D. E. Andreev, Y. A. Agafonov and O. L. Eliseev, *Mendeleev Commun.*, 2023, **33**, 55-57.
- 9 M. Wang, G. Zhang, J. Zhu, W. Li, J. Wang, K. Bian, Y. Liu, F. Ding, C. Song and X. Guo, *Chem. Eng. J.*, 2022, **446**, 137217.
- 10 H. Kang, R. Cao, Y. Zhang, X. Wang, L. Li, W. Chu, R. Zhang, S. Perathoner, G. Centi and Y. Liu, *Nat. Commun.*, 2026, **17**, 3604.
- 11 A. V. Jagtap, M. K. Bamnia, A. Maibam, J. P. Bajpai, S. Gupta, S. K. Thomas, N. B. Dabke and C. P. Vinod, *Chem. Eng. J.*, 2025, **508**, 160705.
- 12 X. Chang, C. Yu, C. Yang, H. Xie, S. Xia, Z. Fang, J. Li, S. Zhang, F. Liu, T. Wang, Y. Tan, X. Chen, S. Shi, Q. Guo, Q. Xu, J. Hu, H. Ding, C. Huang, C. Zhou, J. Zhu, X. Yang and W. Yang, *J. Am. Chem. Soc.*, 2025, **147**, 16164-16170.
- 13 X. Zhou, G. A. Price, G. J. Sunley and C. Copéret, *Angew. Chem. Int. Ed.*, 2023, **135**, e202314274.
- 14 K. Li, X. Li, L. Li, X. Chang, S. Wu, C. Yang, X. Song, Z.-J. Zhao and J. Gong, *JACS Au*, 2023, **3**, 508-515.
- 15 S. Zhang, Z. Wu, X. Liu, Z. Shao, L. Xia, L. Zhong, H. Wang and Y. Sun, *Appl. Catal. B: Environ.*, 2021, **293**, 120207.
- 16 W.-G. Cui, X.-Y. Zhuang, Y.-T. Li, H. Zhang, J.-J. Dai, L. Zhou, Z. Hu and T.-L. Hu, *Appl. Catal. B: Environ.*, 2021, **287**, 119959.
- 17 Z. Zhang, H. Yin, G. Yu, S. He, J. Kang, Z. Liu, K. Cheng, Q. Zhang and Y. Wang, *J. Catal.*, 2021, **395**, 350-361.
- 18 M. Zhang, L. Zhang, M. Wang, G. Zhang, C. Song and X. Guo, *Chin. J. Catal.*, 2025, **68**, 366-375.
- 19 F. Xu, D. Yang, D. Jin, X. Meng, R. Zhao, W. Dai and Z. Xin, *Ind. Eng. Chem. Res.*, 2024, **63**, 20800-20811.
